# Supplementary material for: Lipopolysaccharides induced inflammatory responses and electrophysiological dysfunctions in human-induced pluripotent stem cell derived cardiomyocytes
Source: Sci Rep. 2017 Jun 7;7:2935. doi: 10.1038/s41598-017-03147-4 (PMC5462745; doi:10.1038/s41598-017-03147-4)

# **Lipopolysaccharides induced inflammatory responses and electrophysiological dysfunctions in human-induced pluripotent stem cell derived cardiomyocytes**

Gökhan Yücel<sup>1,2\*</sup>, Zhihan Zhao<sup>1,2\*</sup>, Ibrahim El-Battrawy<sup>1,2</sup>, Huan Lan<sup>1,6</sup>, Siegfried Lang<sup>1,2</sup>, Xin Li<sup>1</sup>, Fanis Buljubasic<sup>1,2</sup>, Wolfram-Hubertus Zimmermann<sup>3,2</sup>, Lukas Cyganek<sup>2,7</sup>, Jochen Utikal<sup>4,2</sup>, Ursula Ravens<sup>8</sup>, Thomas Wieland<sup>5,2</sup>, Martin Borggrefe<sup>1,2</sup>, Xiao-Bo Zhou<sup>1,2,6</sup>, Ibrahim Akin<sup>1,2</sup>

<sup>1</sup>First Department of Medicine, Faculty of Medicine, University Medical Centre Mannheim (UMM), University of Heidelberg, Mannheim, Germany

<sup>2</sup>DZHK (German Center for Cardiovascular Research), Partner Sites, Heidelberg-Mannheim and Göttingen, Germany

<sup>3</sup>Institute of Pharmacology and Toxicology, University of Göttingen, Göttingen, Germany

<sup>4</sup>Skin Cancer Unit, German Cancer Research Center (DKFZ), Heidelberg and Department of Dermatology, Venereology and Allergology, University Medical Center Mannheim, University of Heidelberg, Mannheim, Germany;

<sup>5</sup>Institute of Experimental and Clinical Pharmacology and Toxicology, Medical Faculty Mannheim, University of Heidelberg, Mannheim, Germany

<sup>6</sup>Key Laboratory of Medical Electrophysiology of Ministry of Education, Institute of Cardiovascular Research, Southwest Medical University, Luzhou, Sichuan, China

<sup>7</sup>Stem Cell Unit, Heart Research Center Göttingen, Göttingen, Germany

<sup>8</sup>Institute of Experimental Cardiovascular Medicine, University Heart Centre Freiburg•Bad Krozingen, Freiburg, Germany

\*equally contributed

## **Address for correspondence:**

Xiao-Bo Zhou, MD

First Department of Medicine

University Medical Centre Mannheim

Theodor-Kutzer-Ufer 1-3

68167 Mannheim

Germany

**E-mail:** [Xiaobo.zhou@medma.uni-heidelberg.de](mailto:Xiaobo.zhou@medma.uni-heidelberg.de)

## Legends for supplemental data

### Table S1. List of genes, RefSeq numbers and primers for qPCR.

**Figure S1. Effects of LPS on IL-6 signaling.** **A**, IL-6 concentration in supernatants of hiPSC-CM, which was significantly increased after LPS-treatment in different concentrations for 6h (white bar) or 48h (gray bar) (one-way ANOVA: 6h,  $p<0.0001$ ; 48h,  $p<0.0001$ ). **B**, Representative recordings of cardiac TNNT (Tnnt2) and CD126 from FACS-analysis of hiPSC-CM. The positive signal for cardiac Tnnt2 was detected (P2 gate). But there was no specific antibody binding leading to fluorescence signal for CD126 (P3 gate), either with or without LPS-treatment, suggesting that there was no expression of CD 126 in hiPS-CMs. **C**, sCD130 (glycoprotein 130) concentration in supernatants of hiPSC-CM after LPS treatment in different concentrations for 6h (white bar) or 48h (gray bar). Although 6h-treatment had no influence on sCD130 concentration, 48h-treatment with LPS in high concentrations raised sCD130 concentrations (one-way ANOVA: 6h,  $p=0,51$ ; 48h,  $p=0,019$ ).

**Figure S2. Immunostaining of hiPSC-CM for cardiac structure proteins and NF $\kappa$ b.** Nuclear staining was induced with DAPI (blue). **A-B**, FITC-conjugated cTNNT2 antibody at day 30 after differentiation (green). **C**, FITC-conjugated cTNNT2 antibody (green) plus cy5-conjugated titin antibody (red). **D**, FITC-conjugated NF $\kappa$ b-p65 subunit antibody (green) after cardiomyocyte treatment with 10 $\mu$ g/ml LPS for 6 hours, showing the nuclear-near signal.

**Figure S3. Effect of LPS on apamin-sensitive currents.** Membrane currents were recorded in cells treated by either vehicle (A-C) or 1  $\mu$ g/ml LPS (D-F) for 48h. **A** and **D**, Representative traces of membrane currents from -80 to +80 mV in absence of apamin. **B** and **E**, Representative traces of membrane currents from -80 to +80 mV in presence of 100 nM apamin. **C** and **F**, Representative traces of apamin-sensitive currents.

**Figure S4. Effect of LPS on NS8593-sensitive currents.** Membrane currents were recorded in cells treated by either vehicle (A-C) or 1  $\mu$ g/ml LPS (D-F) for 48h. **A** and **D**, Representative traces of membrane currents in absence of NS8593. **B** and **E**, Representative traces of membrane currents in presence of 10  $\mu$ M NS8593. **C** and **F**, Representative traces of NS8593-sensitive currents.

**Figure S5. Effect of LPS on transient outward currents ( $I_{to}$ ) and L-type  $Ca^{2+}$  channel currents ( $I_{Ca-L}$ ).**  $I_{to}$  and  $I_{Ca-L}$  were evoked by the indicated protocol (B and D) in absence (control) and presence

of LPS. 4-aminopyridine (4-AP, 5mM) was used to isolate  $I_{to}$  from other currents. **A**, Mean values of  $I_{to}$  at +80 mV. **B**, Representative  $I_{to}$ . **C**, Mean values of  $I_{Ca-L}$  at 5 mV. **D**, Representative  $I_{Ca-L}$ . Values given are mean  $\pm$  SEM. n, number of cells. \* $p < 0.05$

**Figure S6. Effect of LPS on rapidly delayed rectifier currents ( $I_{Kr}$ ) and slowly delayed rectifier currents ( $I_{Ks}$ ).**  $I_{Kr}$  and  $I_{Ks}$  were evoked by the indicated protocol (B) in absence (control) and presence of LPS. E-4031 (1 $\mu$ M) was used to isolate  $I_{Kr}$  and chromanol 293B (10 $\mu$ M) was used to isolate  $I_{Ks}$  from other currents. **A**, Mean values of  $I_{Kr}$  at +40 mV. **B**, Representative traces of  $I_{Kr}$  at 40 mV. **C**, Mean values of  $I_{Ks}$  at 40 mV. **D**, Representative  $I_{Ks}$  at 40 mV. Values given are mean  $\pm$  SEM. n, number of cells.

**Figure S7. Effect of LPS on pH- and ATP-sensitive currents ( $I_{KATP}$ ).** **A**, I-V curves of alkaline (pH-8) inhibited currents in absence (control) and presence of LPS. **B**, I-V curves of acidosis (pH-6) inhibited currents in absence (control) and presence of LPS. **C**, Mean values of the pH-sensitive currents at 40 mV. **D**, I-V curves in absence and presence of either glybenclamide or nicorandil in control cells. **E**, I-V curves in absence and presence of either glybenclamide or nicorandil in LPS-treated cells. **F**, Mean values of the currents at -70 mV. Values given are mean  $\pm$  SEM. n, number of cells.

**Figure S8. Effects of LPS on intracellular  $Ca^{2+}$ -concentration.** **A** and **B**, Representative traces of  $Ca^{2+}$ -transients in control and LPS-treated cells. **C** and **D**, Mean values of diastolic and systolic  $Ca^{2+}$ -concentration in control and LPS-treated cells. Values given are mean  $\pm$  SEM. n, number of cells.

**Table S1. List of genes, RefSeq numbers and primers for qPCR.**

| <b>Gene symbol</b>                        | <b>RefSeq No.</b> | <b>Cat. No. Primers</b> |
|-------------------------------------------|-------------------|-------------------------|
| ABCC8 (KATP, beta-subunit SUR1)           | NM_000352         | PPH00038F               |
| CACNA1C (L-type Ca <sup>2+</sup> channel) | NM_000719         | PPH01378G               |
| CCL5                                      | NM_002985         | PPH00703B               |
| CD-14                                     | NM_000591         | PPH05723A               |
| GAPDH                                     | NM_002046         | PPH00150F               |
| IL1B (IL-1 beta)                          | NM_000576         | PPH00171C               |
| IL6                                       | NM_000600         | PPH00560C               |
| IL8                                       | NM_000584         | PPH00568A               |
| IL10                                      | NM_000572         | PPH00572C               |
| KCND3 (Ito, Kv4.3)                        | NM_004980         | PPH06923A               |
| KCNH2 (IKr, Kv11.1)                       | NM_000238         | PPH01660A               |
| KCNJ11 (K <sub>ATP</sub> , alpha-subunit) | NM_000525         | PPH01409B               |
| KCNK3 (TASK-1)                            | NM_002246         | PPH08513A               |
| KCNN2 (SK2)                               | NM_021614         | PPH01665A               |
| KCNN4 (SK4)                               | NM_002250         | PPH01418C               |
| KCNQ1 (I <sub>Ks</sub> , Kv7.1)           | NM_000218         | PPH01419A               |
| LBP                                       | NM_004139         | PPH01424F               |
| Ly96 (MD2)                                | NM_015364         | PPH06052A               |
| MCP-1                                     | NM_002982         | PPH00192F               |
| NfkappaB1                                 | NM_003998         | PPH00204F               |
| RelA                                      | NM_021975         | PPH01812B               |
| SCN10A (Na <sup>+</sup> channel, Nav1.8)  | NM_006514         | PPH15064A               |
| SCN5A (Na <sup>+</sup> channel, Nav1.5)   | NM_000335         | PPH01671F               |
| SLC8A1 (NCX1)                             | NM_021097         | PPH12509B               |
| TIRAP                                     | NM_001039661      | PPH06246B               |
| TLR4                                      | NM_138554         | PPH01795F               |
| TNF-alpha                                 | NM_000594         | PPH00341F               |

RefSeq No. : GenBank NCBI Reference Sequences

Cat. No. Primers: Qiagen RT<sup>2</sup> qPCR Primer Assays

Figure S1

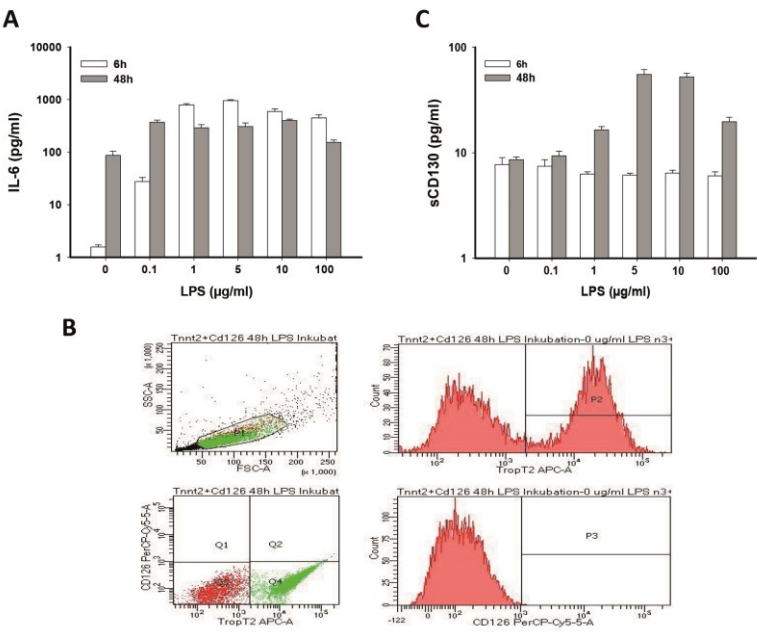

Figure S2

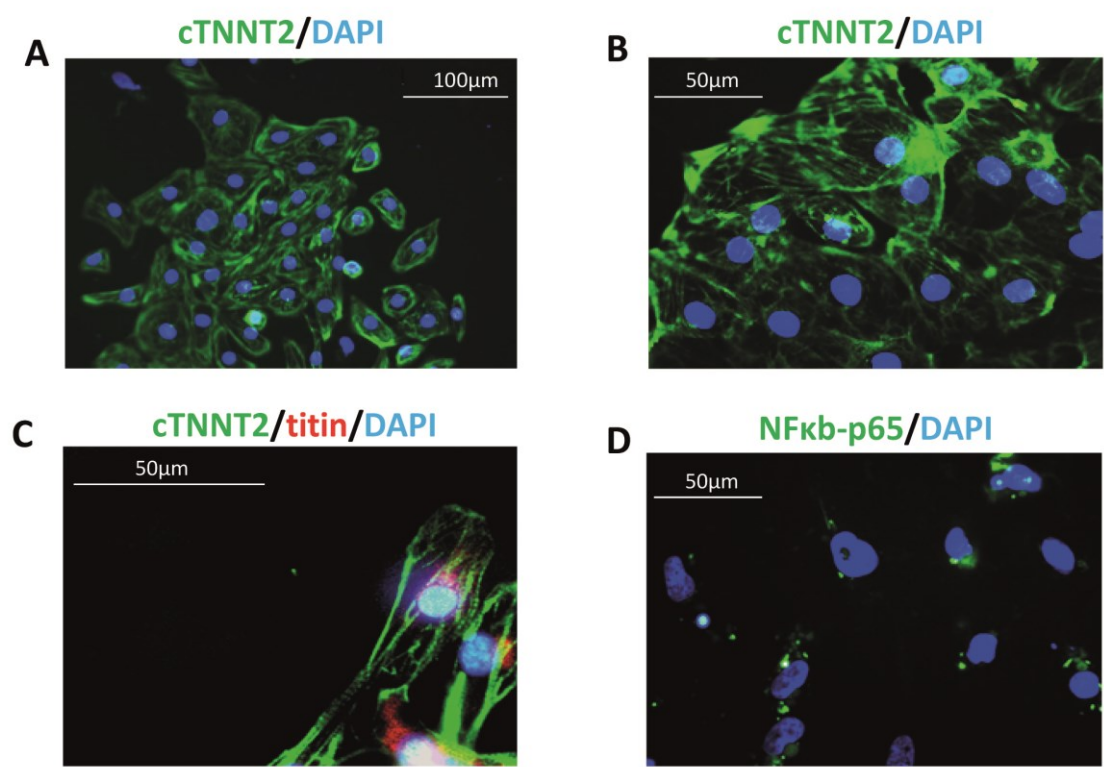

Figure S3

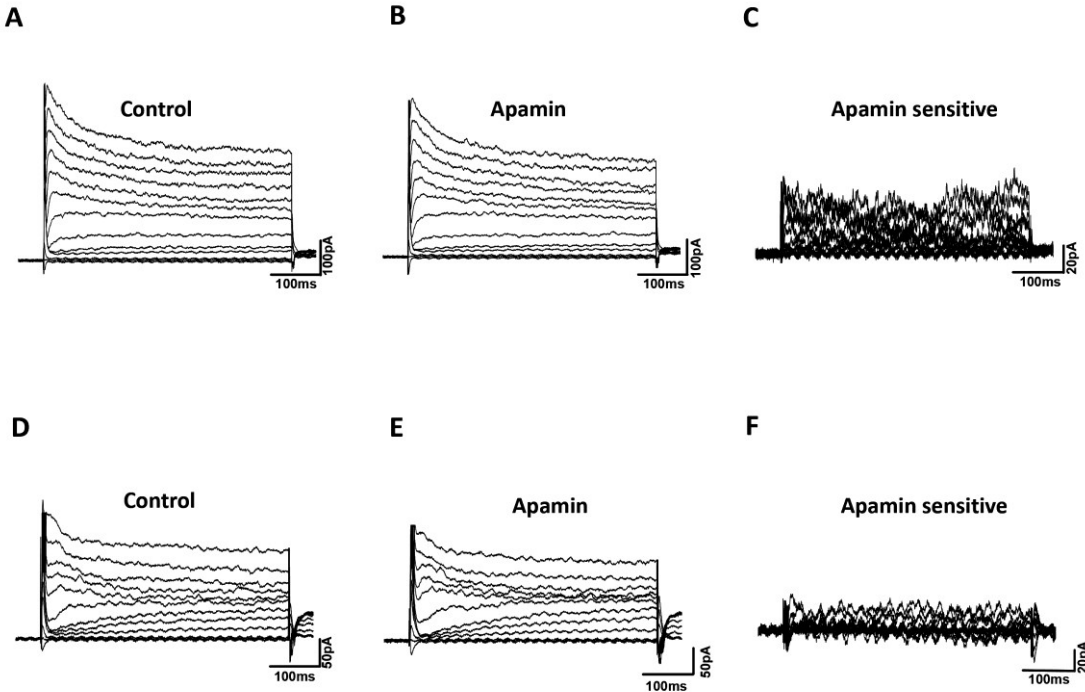

Figure S4

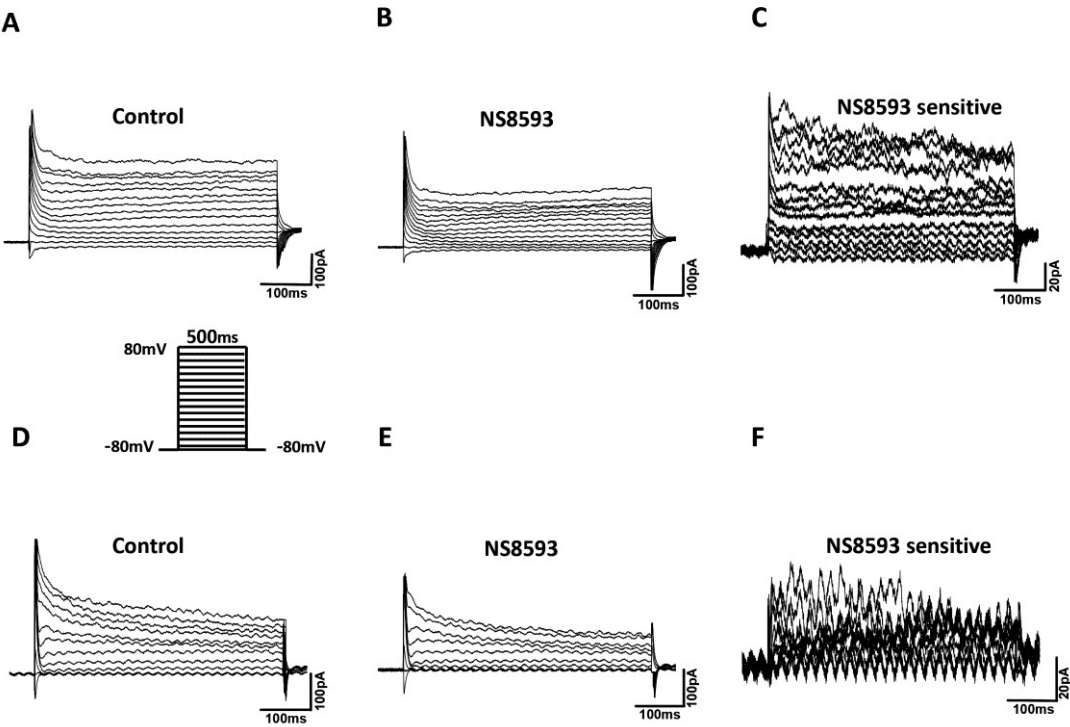

Figure S5

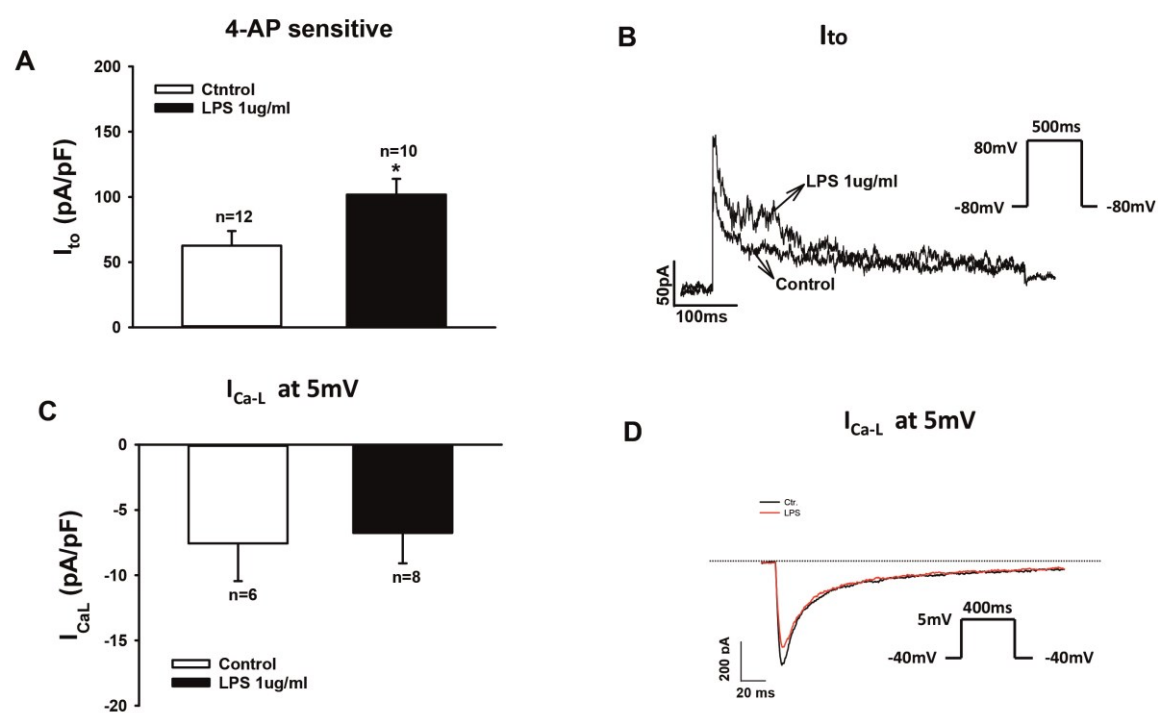

Figure S6

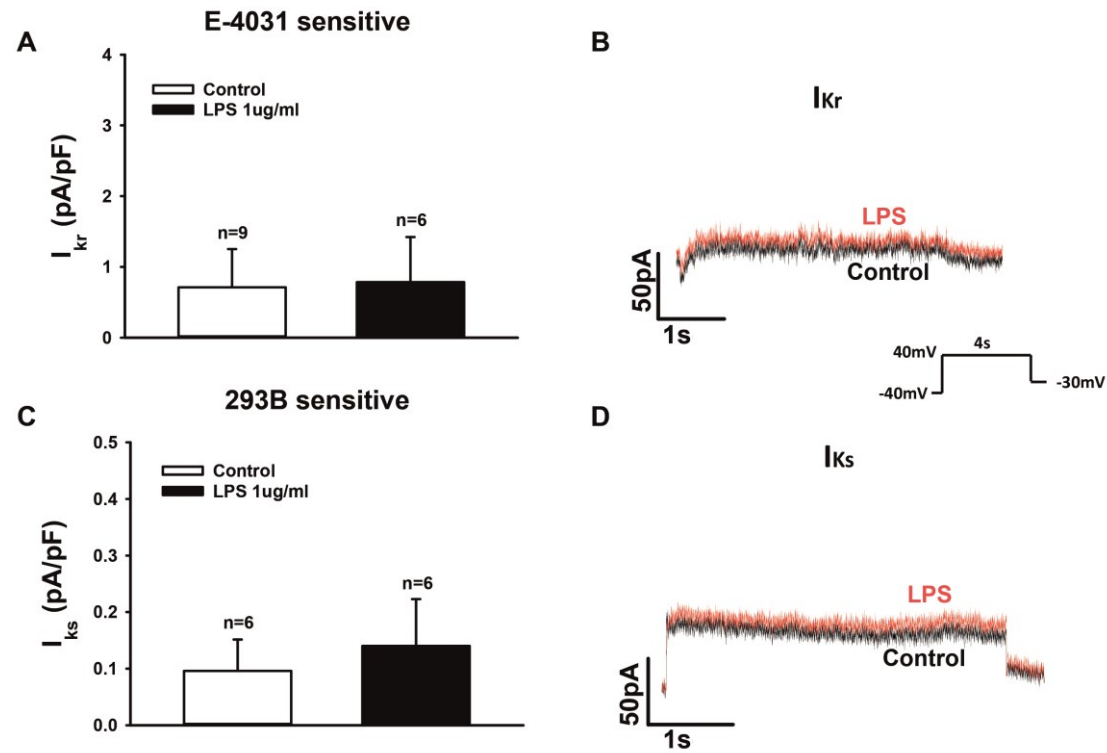

Figure S7

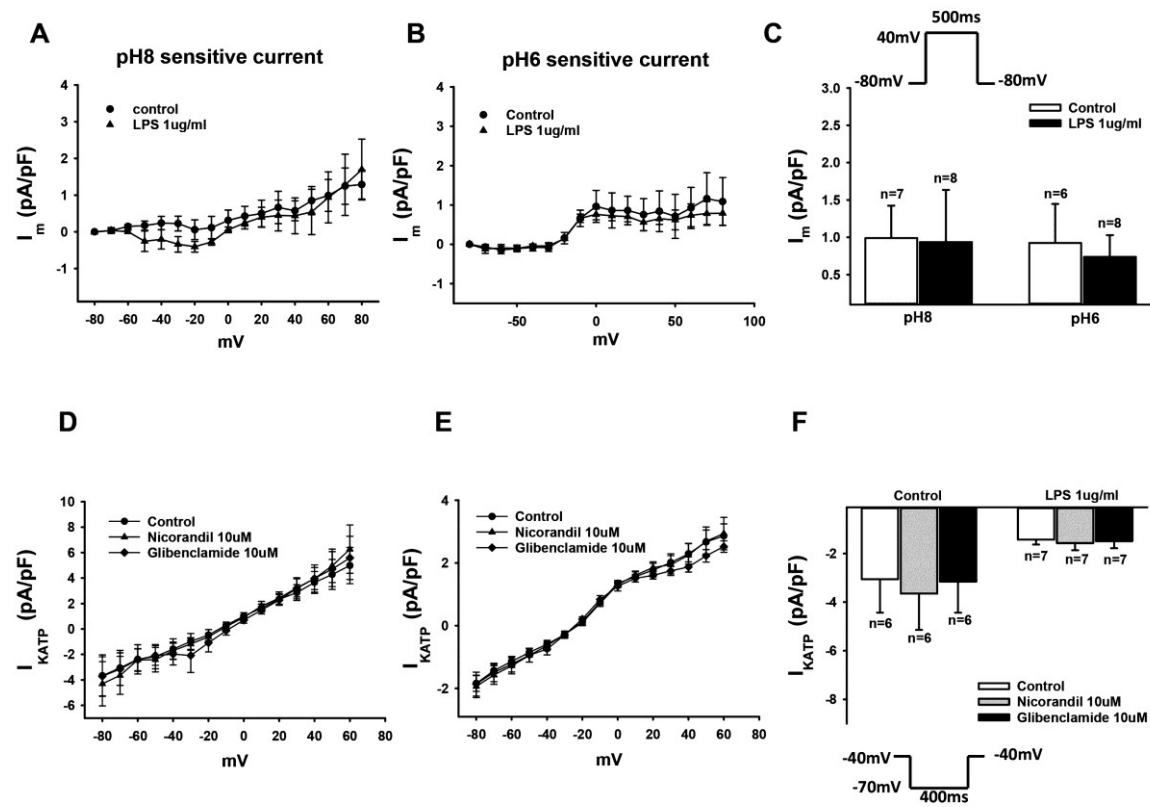

Figure S8

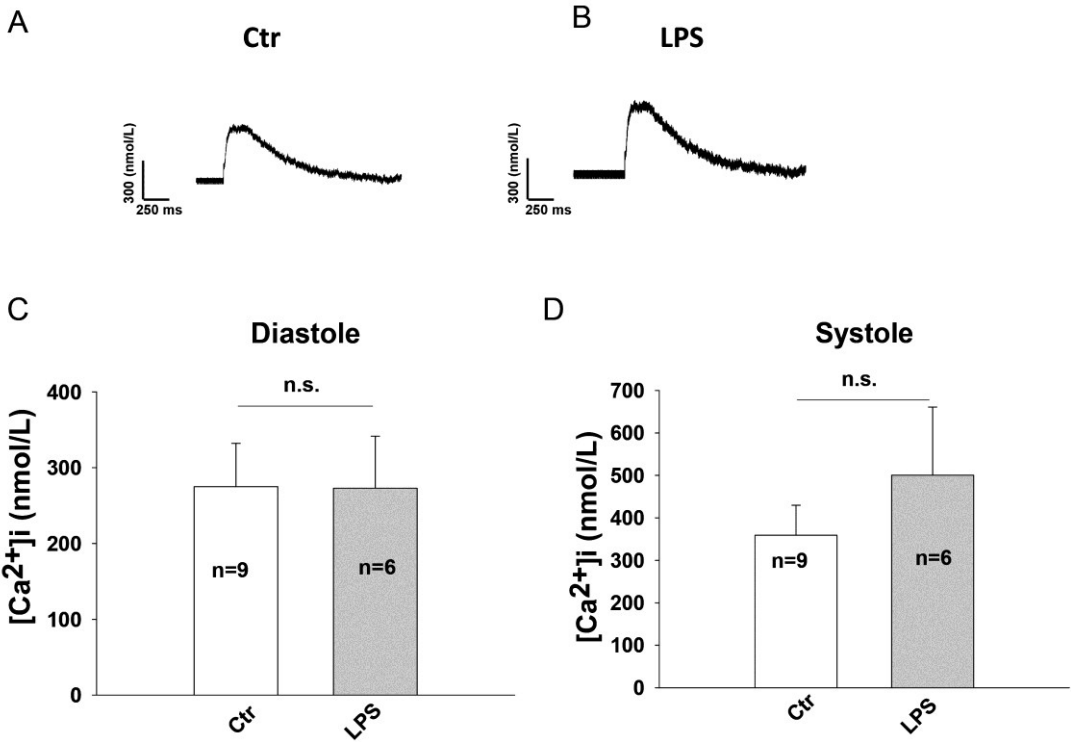

Supplement: Supplementary file 1 — Supplemental data [file 41598_2017_3147_MOESM1_ESM.pdf]
